# Supplementary material for: Bulky ligands shape the separation between the large spin carriers to condition field-induced slow magnetic relaxation
Source: Royal Society of Chemistry journal article supplement (doi:10.1039/c9dt03903a), 2019-11-18
Supplement: c9dt03903a1.pdf [file c9dt03903a1.pdf]

## Supporting Information

# Bulky Ligands Shape the Separation between the Large Spin Carriers to Condition Field-induced Slow Magnetic Relaxation

Jedrzej Kobylarczyk,<sup>a</sup> Michał Liberka,<sup>a</sup> Piotr Konieczny,<sup>\*b</sup> Stanisław Baran,<sup>c</sup>  
Maciej Kubicki,<sup>d</sup> Tomasz Korzeniak,<sup>a</sup> Robert Podgajny<sup>\*,a</sup>

<sup>a</sup>*Faculty of Chemistry, Jagiellonian University, Gronostajowa 2, 30-387 Kraków, Poland*

<sup>b</sup>*Institute of Nuclear Physics PAN, Radzikowskiego 152, 31-342 Kraków, Poland*

<sup>c</sup>*Department of Solid State Physics, Marian Smoluchowski Institute of Physics, Faculty of Physics, Astronomy and Applied Computer Science of the Jagiellonian University, Łojasiewicza 11, 30-348 Kraków, Poland*

<sup>d</sup>*Faculty of Chemistry, Adam Mickiewicz University, Umultowska 89b, 61-614 Poznań*

### TABLE OF CONTENTS

#### I. Structural Description

|                                                                                                                                                                        |     |
|------------------------------------------------------------------------------------------------------------------------------------------------------------------------|-----|
| Selected parameters and structural data of compounds <b>1</b> , <b>1a</b> and <b>2</b> . (Table S1)                                                                    | S3  |
| Asymmetric unit of compounds <b>1</b> , <b>1a</b> , <b>2</b> . (Figure S1-S3)                                                                                          | S4  |
| Detailed distances and angles within structures <b>1</b> , <b>1a</b> , <b>2</b> (Table S2-S5)                                                                          | S6  |
| Comparison of Mn <sub>8</sub> super-cube deformation in cluster A and B skeletons of compound <b>2</b> . (Figure S4)                                                   | S10 |
| Comparison of W <sub>6</sub> super-cube deformation in cluster A and B skeletons of compound <b>2</b> . (Figure S5)                                                    | S11 |
| Comparison of experimental powder X-ray diffraction patterns of compounds <b>1</b> , <b>1a</b> , <b>2</b> with PXRD patterns calculated from SC-XRD model. (Figure S6) | S12 |
| Results of Continuous Shape Measure Analysis (CSM) for Mn <sup>2+</sup> sites in <b>1</b> , <b>1a</b> , <b>2</b> . (Table S6)                                          | S13 |
| Results of Continuous Shape Measure Analysis (CSM) for [W(CN) <sub>8</sub> ] <sup>3-</sup> anions in <b>1</b> , <b>1a</b> , <b>2</b> . (Table S7)                      | S14 |
| List of intermetallic separations between cluster units for compound <b>2</b> . (Table S8)                                                                             | S15 |
| Map of intermetallic separations between cluster units for compound <b>2</b> . (Figure S7)                                                                             | S15 |

#### II. Magnetic properties

|                                                                                                                                   |     |
|-----------------------------------------------------------------------------------------------------------------------------------|-----|
| Temperature dependence of $\chi T$ for <b>1</b> , <b>1a</b> and <b>2</b> . (Figure S8)                                            | S16 |
| Isothermal magnetization measured at 2.0 K for <b>1</b> , <b>1a</b> and <b>2</b> . (Figure S9)                                    | S17 |
| Relaxation equations of generalized Debye model used in analysis. (Equation S1-S5)                                                | S17 |
| Frequency dependence of in-phase ac susceptibility ( $\chi'$ ) in dc field range: 0 - 10 kOe at 2.0 K for <b>1</b> . (Figure S10) | S18 |

|                                                                                                                                                                   |     |
|-------------------------------------------------------------------------------------------------------------------------------------------------------------------|-----|
| Frequency dependence of out-of-phase ac susceptibility ( $\chi''$ ) in dc field range: 0 - 900 Oe at 2.0 K for <b>1</b> . (Figure S11)                            |     |
| Frequency dependence of out-of-phase component of ac susceptibility ( $\chi''$ ) in dc field range: 1 – 10 kOe at 2.0 K for <b>1</b> . (Figure S12)               |     |
| dc field dependence of $\alpha$ parameter, $\chi_s$ and $\chi_t$ at 2.0 K for <b>1</b> . (Figure S13)                                                             |     |
| Frequency dependence of in-phase ac susceptibility ( $\chi'$ ) in dc field range: 0 - 1 kOe at 2.0 K for <b>1a</b> . (Figure S14)                                 | S19 |
| Frequency dependence of out-of-phase ac susceptibility ( $\chi''$ ) in dc field range: 0 - 1 kOe at 2.0 K for <b>1a</b> . (Figure S15)                            |     |
| dc field dependence of $\alpha$ parameter, $\chi_s$ and $\chi_t$ at 2.0 K for <b>1a</b> . (Figure S16)                                                            |     |
| dc field dependence of the weight of the slow relaxation process $\beta$ at 2.0 K for <b>1a</b> . (Figure S17)                                                    | S20 |
| Frequency dependence of in-phase ac susceptibility ( $\chi'$ ) in dc field range: 0 – 9 kOe at 2.0 K for <b>2</b> . (Figure S18)                                  |     |
| Frequency dependence of out-of-phase ac susceptibility ( $\chi''$ ) in dc field range: 0 - 1000 Oe at 2.0 K for <b>2</b> . (Figure S19)                           |     |
| Frequency dependence of out-of-phase ac susceptibility ( $\chi''$ ) in dc field range: 1100 - 9000 Oe at 2.0 K for <b>2</b> . (Figure S20)                        | S21 |
| dc field dependence of $\alpha$ parameter, $\chi_s$ and $\chi_t$ at 2.0 K for <b>2</b> . (Figure S21)                                                             |     |
| dc field dependence of the weight of the slow relaxation process $\beta$ at 2.0 K for <b>2</b> . (Figure S22)                                                     |     |
| Frequency dependence of in-phase ac susceptibility ( $\chi'$ ) with applied field of 200 Oe in temperature range: 2.0 K - 6.0 K for <b>1</b> . (Figure S23)       | S22 |
| Frequency dependence of out-of-phase ac susceptibility ( $\chi''$ ) with applied field of 200 Oe in temperature range: 2.0 K - 6.0 K for <b>1</b> . (Figure S24)  |     |
| Temperature dependence of $\alpha$ parameter, $\chi_s$ and $\chi_t$ with applied field of 200 Oe for <b>1</b> . (Figure S25)                                      |     |
| Frequency dependence of in-phase ac susceptibility ( $\chi'$ ) with applied field of 300 Oe in temperature range: 2.0 K - 7.0 K for <b>1a</b> . (Figure S26)      | S23 |
| Frequency dependence of out-of-phase ac susceptibility ( $\chi''$ ) with applied field of 300 Oe in temperature range: 2.0 K - 7.0 K for <b>1a</b> . (Figure S27) |     |
| Temperature dependence of $\alpha$ parameter, $\chi_s$ and $\chi_t$ with applied field of 300 Oe for <b>1a</b> . (Figure S28)                                     |     |
| Temperature dependence of the weight of the slow relaxation process $\beta$ in applied field 300 Oe for <b>1a</b> . (Figure S29)                                  | S24 |
| Frequency dependence of in-phase ac susceptibility ( $\chi'$ ) with applied field of 700 Oe in temperature range: 2.0 K - 6.0 K for <b>2</b> . (Figure S30)       |     |
| Frequency dependence of out-of-phase ac susceptibility ( $\chi''$ ) with applied field of 700 Oe in temperature range: 2.0 K - 6.0 K for <b>2</b> . (Figure S31)  |     |
| Temperature dependence of $\alpha$ parameter, $\chi_s$ and $\chi_t$ with applied field of 700 Oe for <b>2</b> . (Figure S32)                                      | S25 |
| Temperature dependence of the weight of the slow relaxation process $\beta$ in applied field of 700 Oe for <b>2</b> . (Figure S33)                                |     |

# I. Structural description

**Table S1.** Selected parameters and structural data of compounds **1**, **1a** and **2**

| Compound                                               | <b>1</b>                                                                                         | <b>1a</b>                                                                                        | <b>2</b>                                                                                         |
|--------------------------------------------------------|--------------------------------------------------------------------------------------------------|--------------------------------------------------------------------------------------------------|--------------------------------------------------------------------------------------------------|
| Empirical formula                                      | C <sub>219</sub> H <sub>230</sub> Mn <sub>9</sub> N <sub>64</sub> O <sub>22</sub> W <sub>6</sub> | C <sub>222</sub> H <sub>280</sub> Mn <sub>9</sub> N <sub>64</sub> O <sub>14</sub> W <sub>6</sub> | C <sub>277</sub> H <sub>159</sub> Mn <sub>9</sub> N <sub>64</sub> O <sub>43</sub> W <sub>6</sub> |
| Formula weight                                         | 5708.22                                                                                          | 5666.64                                                                                          | 6669.23                                                                                          |
| T, K                                                   | 100                                                                                              | 100                                                                                              | 117                                                                                              |
| Crystal system                                         | triclinic                                                                                        | triclinic                                                                                        | Triclinic                                                                                        |
| Space group                                            | P-1                                                                                              | P-1                                                                                              | P-1                                                                                              |
| a, Å                                                   | 20.2710(13)                                                                                      | 16.0808(10)                                                                                      | 24.8236(9)                                                                                       |
| b, Å                                                   | 20.3406(13)                                                                                      | 20.4138(10)                                                                                      | 25.1491(8)                                                                                       |
| c, Å                                                   | 20.3665(13)                                                                                      | 20.5125(13)                                                                                      | 25.8948(9)                                                                                       |
| α, deg                                                 | 93.7930(10)                                                                                      | 82.386(5)                                                                                        | 89.0040(10)                                                                                      |
| β, deg                                                 | 98.1180(10)                                                                                      | 74.694(5)                                                                                        | 83.0100(10)                                                                                      |
| γ, deg                                                 | 96.5350(10)                                                                                      | 86.907(4)                                                                                        | 87.2110(10)                                                                                      |
| V, Å <sup>3</sup>                                      | 8230.5(9)                                                                                        | 6436.3(7)                                                                                        | 16025.7(10)                                                                                      |
| Z                                                      | 1                                                                                                | 1                                                                                                | 2                                                                                                |
| ρ <sub>calc</sub> , g/cm <sup>3</sup>                  | 1.152                                                                                            | 1.462                                                                                            | 1.382                                                                                            |
| Abs coefficient, mm <sup>-1</sup>                      | 2.471                                                                                            | 3.157                                                                                            | 2.555                                                                                            |
| F [000]                                                | 2837.0                                                                                           | 2841.0                                                                                           | 6564.0                                                                                           |
| Crystal size, mm <sup>3</sup>                          | 0.25 × 0.21 × 0.09                                                                               | 0.15 × 0.15 × 0.12                                                                               | 0.26 × 0.18 × 0.11                                                                               |
| 2θ range, deg                                          | 4.59 to 50.054                                                                                   | 6.042 to 50.000                                                                                  | 4.508 to 50.056                                                                                  |
| Index range                                            | -24 ≤ h ≤ 24,<br>-24 ≤ k ≤ 24,<br>-24 ≤ l ≤ 24                                                   | -19 ≤ h ≤ 19,<br>-24 ≤ k ≤ 24,<br>-24 ≤ l ≤ 24                                                   | -29 ≤ h ≤ 29,<br>-29 ≤ k ≤ 29,<br>-30 ≤ l ≤ 30                                                   |
| Reflections collected                                  | 97439                                                                                            | 112115                                                                                           | 201199                                                                                           |
| Independent reflections                                | 29042                                                                                            | 22598                                                                                            | 56317                                                                                            |
| R <sub>int</sub>                                       | 0.0694                                                                                           | 0.1213                                                                                           | 0.0922                                                                                           |
| Data / restraints / parameters                         | 29042/148/1654                                                                                   | 22598/820/1455                                                                                   | 56317/125/3475                                                                                   |
| Goodness-of-fit on F <sup>2</sup>                      | 1.019                                                                                            | 1.089                                                                                            | 1.015                                                                                            |
| Final R indices [I ≥ 2σ (I)]                           | R <sub>1</sub> = 0.0501,<br>wR <sub>2</sub> = 0.1242                                             | R <sub>1</sub> = 0.0667,<br>wR <sub>2</sub> = 0.1166                                             | R <sub>1</sub> = 0.0553,<br>wR <sub>2</sub> = 0.1233                                             |
| R indices (all data)                                   | R <sub>1</sub> = 0.0844,<br>wR <sub>2</sub> = 0.1433                                             | R <sub>1</sub> = 0.1187,<br>wR <sub>2</sub> = 0.1318                                             | R <sub>1</sub> = 0.0942,<br>wR <sub>2</sub> = 0.1396                                             |
| Largest diff peak/hole, e <sup>-</sup> Å <sup>-3</sup> | 2.25/-1.15                                                                                       | 2.52/-1.35                                                                                       | 3.07 / -1.28                                                                                     |

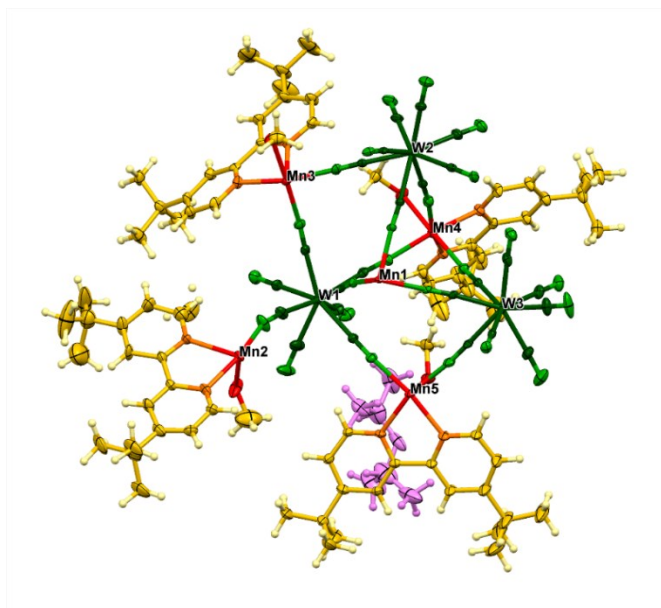

**Figure S1.** Asymmetric unit of **1** with atom labelling scheme for metal ions. Atoms spheres are shown with 50% probability ellipsoids. Colours: W, dark green; Mn, red; C of cyanide ligands, green; N of cyanide ligands, light green; N of Bu<sub>2</sub>bpy ligand, orange, C of Bu<sub>2</sub>bpy, intense yellow ; H, pale yellow; O of MeOH molecules red; C of MeOH molecules, intense yellow; iPr-O-iPr molecule, magenta.

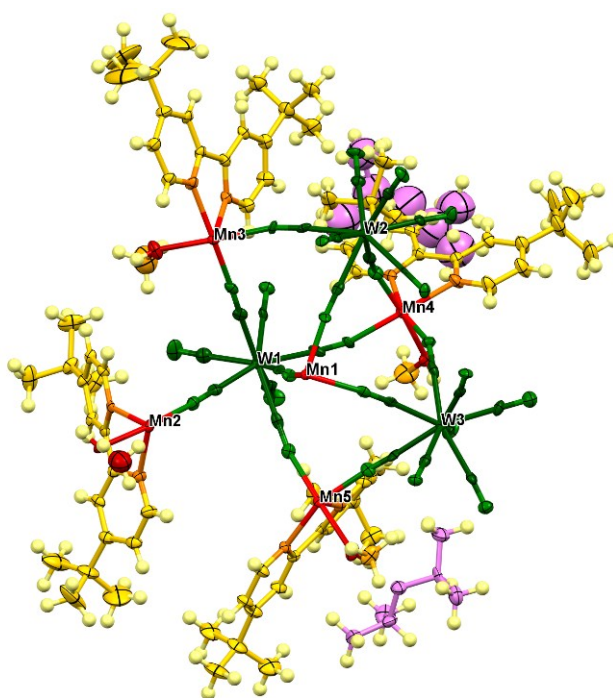

**Figure S2.** Asymmetric unit of **1a** with atom labelling scheme for metal ions. Atoms spheres are shown with 50% probability ellipsoids. Colours: W, dark green; Mn, red; C of cyanide ligands, green; N of cyanide ligands, light green; N of Bu<sub>2</sub>bpy ligand, orange, C of Bu<sub>2</sub>bpy, intense yellow ; H, pale yellow; O of MeOH molecules red; C of MeOH molecules, intense yellow; iPr-O-iPr molecule, magenta.

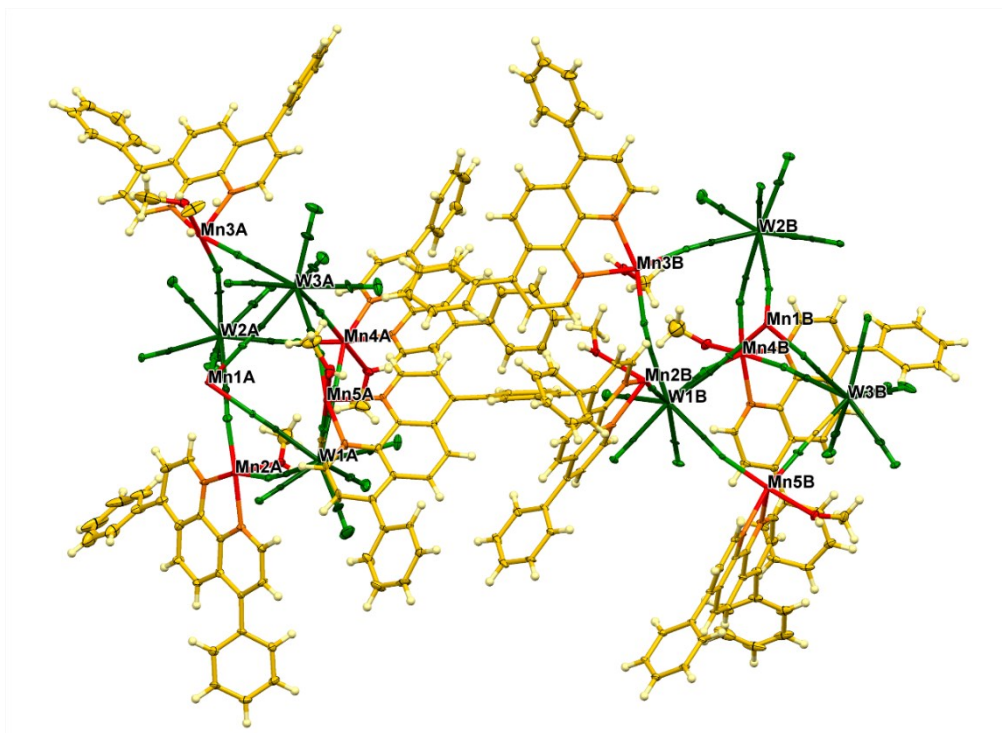

**Figure S3.** Asymmetric unit of **2** with atom labelling scheme for metal ions. Atoms spheres are shown with 50% probability ellipsoids. Colours: W, dark green; Mn, red; C of cyanide ligands, green; N of cyanide ligands, light green; N of Ph<sub>2</sub>phen ligand, orange, C of Ph<sub>2</sub>phen, intense yellow ; H, pale yellow; O of MeOH molecules red; C of MeOH molecules, intense yellow.

**Table S2.** Detailed distances and angles within structure **1**.

| Interatomic distances [Å] |          |           |            | Angles [°] |           |             |          |
|---------------------------|----------|-----------|------------|------------|-----------|-------------|----------|
| W1-C11                    | 2.154(7) | Mn1-N11   | 2.199(6)   | W1-C11-N11 | 175.3(7)  | Mn1-N11-C11 | 170.0(6) |
| W1-C12                    | 2.159(9) | Mn1-N21   | 2.188(6)   | W1-C12-N12 | 172.9(8)  | Mn1-N21-C21 | 172.2(6) |
| W1-C13                    | 2.170(8) | Mn1-N31   | 2.184(6)   | W1-C13-N13 | 174.9(6)  | Mn1-N31-C31 | 172.0(6) |
| W1-C14                    | 2.152(9) | Mn2-N12   | 2.173(7)   | W1-C14-N14 | 175.5(7)  | Mn2-N12-C12 | 161.2(8) |
| W1-C15                    | 2.161(8) | Mn2-N22   | 2.169(7)   | W1-C15-N15 | 178.0(6)  | Mn2-N22-C22 | 159.8(7) |
| W1-C16                    | 2.163(8) | Mn2-N32   | 2.178(7)   | W1-C16-N16 | 177.4(9)  | Mn2-N32-C32 | 154.5(7) |
| W1-C17                    | 2.158(9) | Mn2-N41   | 2.227(7)   | W1-C17-N17 | 178.5(8)  | Mn3-N13-C13 | 164.4(6) |
| W1-C18                    | 2.157(7) | Mn2-N40A* | 2.303(19)* | W1-C18-N18 | 179.4(8)  | Mn3-N23-C23 | 177.8(7) |
| W2-C21                    | 2.164(7) | Mn2-N40B* | 2.316(19)* | W2-C21-N21 | 175.4(6)  | Mn3-N33-C33 | 171.5(6) |
| W2-C22                    | 2.164(8) | Mn2-O1MA* | 2.169(18)* | W2-C22-N22 | 174.2(8)  | Mn4-N14-C14 | 175.8(6) |
| W2-C23                    | 2.157(8) | Mn2-O1MB* | 2.173(18)* | W2-C23-N23 | 178.4(6)  | Mn4-N24-C24 | 172.5(6) |
| W2-C24                    | 2.140(8) | Mn3-N13   | 2.242(7)   | W2-C24-N24 | 178.6(7)  | Mn4-N34-C34 | 164.9(6) |
| W2-C25                    | 2.167(8) | Mn3-N23   | 2.164(7)   | W2-C25-N25 | 175.6(6)  | Mn5-N15-C15 | 173.5(7) |
| W2-C26                    | 2.132(8) | Mn3-N33   | 2.163(7)   | W2-C26-N26 | 178.4(8)  | Mn5-N25-C25 | 164.4(6) |
| W2-C27                    | 2.186(9) | Mn3-N60   | 2.224(6)   | W2-C27-N27 | 177.8(8)  | Mn5-N35-C35 | 173.8(6) |
| W2-C28                    | 2.172(8) | Mn3-N61   | 2.243(6)   | W2-C28-N28 | 178.8(8)  |             |          |
| W3-C31                    | 2.162(7) | Mn3-O2M   | 2.227(6)   | W3-C31-N31 | 175.4(6)  |             |          |
| W3-C32                    | 2.145(8) | Mn4-N14   | 2.159(7)   | W3-C32-N32 | 173.9(7)  |             |          |
| W3-C33                    | 2.158(8) | Mn4-N24   | 2.170(7)   | W3-C33-N33 | 179.2(7)  |             |          |
| W3-C34                    | 2.189(8) | Mn4-N34   | 2.261(7)   | W3-C34-N34 | 175.6(6)  |             |          |
| W3-C35                    | 2.147(7) | Mn4-N80   | 2.212(6)   | W3-C35-N35 | 176.3(6)  |             |          |
| W3-C36                    | 2.148(9) | Mn4-N81   | 2.232(6)   | W3-C36-N36 | 179.7(8)  |             |          |
| W3-C37                    | 2.180(9) | Mn4-O3M   | 2.243(6)   | W3-C37-N37 | 176.4(10) |             |          |
| W3-C38                    | 2.148(9) | Mn5-N15   | 2.172(7)   | W3-C38-N38 | 178.3(8)  |             |          |
|                           |          | Mn5-N25   | 2.238(7)   |            |           |             |          |
|                           |          | Mn5-N35   | 2.167(7)   |            |           |             |          |
|                           |          | Mn5-N100  | 2.240(6)   |            |           |             |          |
|                           |          | Mn5-N101  | 2.212(6)   |            |           |             |          |
|                           |          | Mn5-O4M   | 2.238(6)   |            |           |             |          |

\* - Mn2 site is coordinated by two sets of crystallographically independent MeOH, btubupy, ligands.

**Table S3.** Detailed distances and angles within structure **1a**.

| Interatomic distances [Å] |           |          |          | Angles [°] |           |             |          |
|---------------------------|-----------|----------|----------|------------|-----------|-------------|----------|
| W1-C11                    | 2.151(10) | Mn1-N11  | 2.194(8) | W1-C11-N11 | 175.8(9)  | Mn1-N11-C11 | 169.3(8) |
| W1-C12                    | 2.148(11) | Mn1-N21  | 2.181(9) | W1-C12-N12 | 176.5(8)  | Mn1-N21-C21 | 176.7(8) |
| W1-C13                    | 2.163(12) | Mn1-N31  | 2.220(9) | W1-C13-N13 | 178.5(9)  | Mn1-N31-C31 | 176.8(8) |
| W1-C14                    | 2.149(12) | Mn2-N12  | 2.201(9) | W1-C14-N14 | 176.7(10) | Mn2-N12-C12 | 164.9(9) |
| W1-C15                    | 2.162(12) | Mn2-N22  | 2.137(9) | W1-C15-N15 | 174.3(9)  | Mn2-N22-C22 | 167.8(9) |
| W1-C16                    | 2.169(12) | Mn2-N32  | 2.196(9) | W1-C16-N16 | 178.7(10) | Mn2-N32-C32 | 173.7(9) |
| W1-C17                    | 2.150(13) | Mn2-N40  | 2.267(9) | W1-C17-N17 | 178.0(11) | Mn3-N13-C13 | 172.2(8) |
| W1-C18                    | 2.171(11) | Mn2-N41  | 2.218(8) | W1-C18-N18 | 178.3(9)  | Mn3-N23-C23 | 166.9(9) |
| W2-C21                    | 2.174(12) | Mn2-O1   | 2.221(7) | W2-C21-N21 | 174.8(9)  | Mn3-N33-C33 | 157.2(9) |
| W2-C22                    | 2.172(11) | Mn3-N13  | 2.172(9) | W2-C22-N22 | 178.8(9)  | Mn4-N14-C14 | 175.8(9) |
| W2-C23                    | 2.200(11) | Mn3-N23  | 2.271(9) | W2-C23-N23 | 175.8(9)  | Mn4-N24-C24 | 171.0(8) |
| W2-C24                    | 2.176(12) | Mn3-N33  | 2.159(9) | W2-C24-N24 | 172.6(10) | Mn4-N34-C34 | 158.4(8) |
| W2-C25                    | 2.165(12) | Mn3-N60  | 2.209(8) | W2-C25-N25 | 177.4(9)  | Mn5-N15-C15 | 173.3(8) |
| W2-C26                    | 2.162(12) | Mn3-N61  | 2.247(9) | W2-C26-N26 | 176.4(9)  | Mn5-N25-C25 | 149.2(9) |
| W2-C27                    | 2.146(11) | Mn3-O2   | 2.285(7) | W2-C27-N27 | 179.3(11) | Mn5-N35-C35 | 174.2(9) |
| W2-C28                    | 2.167(11) | Mn4-N14  | 2.192(9) | W2-C28-N28 | 176.6(9)  |             |          |
| W3-C31                    | 2.153(11) | Mn4-N24  | 2.161(9) | W3-C31-N31 | 176.6(9)  |             |          |
| W3-C32                    | 2.189(12) | Mn4-N34  | 2.170(9) | W3-C32-N32 | 172.6(9)  |             |          |
| W3-C33                    | 2.150(12) | Mn4-N80  | 2.277(9) | W3-C33-N33 | 178.0(9)  |             |          |
| W3-C34                    | 2.176(12) | Mn4-N81  | 2.232(8) | W3-C34-N34 | 174.1(9)  |             |          |
| W3-C35                    | 2.155(12) | Mn4-O3   | 2.285(7) | W3-C35-N35 | 176.9(9)  |             |          |
| W3-C36                    | 2.177(11) | Mn5-N15  | 2.207(9) | W3-C36-N36 | 173.4(9)  |             |          |
| W3-C37                    | 2.165(12) | Mn5-N25  | 2.147(9) | W3-C37-N37 | 174.7(9)  |             |          |
| W3-C38                    | 2.160(12) | Mn5-N35  | 2.192(9) | W3-C38-N38 | 177.9(10) |             |          |
|                           |           | Mn5-N100 | 2.192(8) |            |           |             |          |
|                           |           | Mn5-N101 | 2.244(8) |            |           |             |          |
|                           |           | Mn5-O4M  | 2.256(7) |            |           |             |          |

**Table S4.** Detailed distances and angles within cluster A of structure **2**.

| Interatomic distances [Å] |           |           |          | Angles [°]  |           |              |          |
|---------------------------|-----------|-----------|----------|-------------|-----------|--------------|----------|
| W1A-C11                   | 2.179(8)  | Mn1A-N11A | 2.197(7) | W1A-C11-N11 | 175.8(7)  | Mn1A-N11-C11 | 171.2(7) |
| W1A-C12                   | 2.165(10) | Mn1A-N21A | 2.225(7) | W1A-C12-N12 | 174.5(7)  | Mn1A-N21-C21 | 172.0(6) |
| W1A-C13                   | 2.157(9)  | Mn1A-N31A | 2.225(7) | W1A-C13-N13 | 178.4(8)  | Mn1A-N31-C31 | 172.3(7) |
| W1A-C14                   | 2.142(8)  | Mn2A-N12A | 2.214(9) | W1A-C14-N14 | 177.9(8)  | Mn2A-N12-C12 | 166.1(7) |
| W1A-C15                   | 2.160(10) | Mn2A-N22A | 2.214(7) | W1A-C15-N15 | 178.2(8)  | Mn2A-N22-C22 | 174.7(7) |
| W1A-C16                   | 2.141(10) | Mn2A-N32A | 2.255(8) | W1A-C16-N16 | 177.3(10) | Mn2A-N32-C32 | 169.9(7) |
| W1A-C17                   | 2.172(10) | Mn2A-N100 | 2.268(7) | W1A-C17-N17 | 178.5(9)  | Mn3A-N13-C13 | 165.1(8) |
| W1A-C18                   | 2.165(10) | Mn2A-N101 | 2.261(7) | W1A-C18-N18 | 176.8(9)  | Mn3A-N23-C23 | 160.7(7) |
| W2A-C21                   | 2.179(9)  | Mn2A-O1M  | 2.196(6) | W2A-C21-N21 | 178.4(7)  | Mn3A-N33-C33 | 179.0(7) |
| W2A-C22                   | 2.170(8)  | Mn3A-N13A | 2.184(7) | W2A-C22-N22 | 177.0(8)  | Mn4A-N14-C14 | 177.4(7) |
| W2A-C23                   | 2.148(9)  | Mn3A-N23A | 2.242(8) | W2A-C23-N23 | 177.4(8)  | Mn4A-N24-C24 | 167.7(8) |
| W2A-C24                   | 2.152(9)  | Mn3A-N33A | 2.170(8) | W2A-C24-N24 | 176.6(8)  | Mn4A-N34-C34 | 164.0(7) |
| W2A-C25                   | 2.160(9)  | Mn3A-N200 | 2.248(7) | W2A-C25-N25 | 177.6(7)  | Mn5A-N15-C15 | 172.6(7) |
| W2A-C26                   | 2.162(9)  | Mn3A-N201 | 2.220(7) | W2A-C26-N26 | 178.1(8)  | Mn5A-N25-C25 | 172.3(8) |
| W2A-C27                   | 2.182(9)  | Mn3A-O2M  | 2.245(6) | W2A-C27-N27 | 178.1(10) | Mn5A-N35-C35 | 168.8(7) |
| W2A-C28                   | 2.166(10) | Mn4A-N14  | 2.165(7) | W2A-C28-N28 | 177.7(10) |              |          |
| W3A-C31                   | 2.161(8)  | Mn4A-N24  | 2.169(8) | W3A-C31-N31 | 176.4(7)  |              |          |
| W3A-C32                   | 2.169(9)  | Mn4A-N34  | 2.244(8) | W3A-C32-N32 | 174.3(7)  |              |          |
| W3A-C33                   | 2.169(9)  | Mn4A-N300 | 2.223(6) | W3A-C33-N33 | 178.7(9)  |              |          |
| W3A-C34                   | 2.164(9)  | Mn4A-N301 | 2.242(7) | W3A-C34-N34 | 177.7(7)  |              |          |
| W3A-C35                   | 2.149(9)  | Mn4A-O3M  | 2.248(6) | W3A-C35-N35 | 177.7(8)  |              |          |
| W3A-C36                   | 2.176(10) | Mn5A-N15  | 2.210(8) | W3A-C36-N36 | 179.4(11) |              |          |
| W3A-C37                   | 2.128(9)  | Mn5A-N25  | 2.168(7) | W3A-C37-N37 | 179.5(10) |              |          |
| W3A-C38                   | 2.154(10) | Mn5A-N35  | 2.139(8) | W3A-C38-N38 | 178.1(10) |              |          |
|                           |           | Mn5A-N400 | 2.253(7) |             |           |              |          |
|                           |           | Mn5A-N401 | 2.233(7) |             |           |              |          |
|                           |           | Mn5A-O4M  | 2.241(7) |             |           |              |          |



**Table S5.** Detailed distances and angles within cluster B of structure **2**.

| Interatomic distances [Å] |           |           |          | Angles [°]  |           |              |          |
|---------------------------|-----------|-----------|----------|-------------|-----------|--------------|----------|
| W1B-C11                   | 2.189(8)  | Mn1B-N11A | 2.217(6) | W1B-C11-N11 | 174.7(7)  | Mn1B-N11-C11 | 173.7(7) |
| W1B-C12                   | 2.172(9)  | Mn1B-N21A | 2.249(7) | W1B-C12-N12 | 177.6(7)  | Mn1B-N21-C21 | 170.8(7) |
| W1B-C13                   | 2.162(8)  | Mn1B-N31A | 2.249(7) | W1B-C13-N13 | 175.1(7)  | Mn1B-N31-C31 | 163.1(7) |
| W1B-C14                   | 2.146(8)  | Mn2B-N12A | 2.178(8) | W1B-C14-N14 | 177.7(7)  | Mn2B-N12-C12 | 174.5(7) |
| W1B-C15                   | 2.177(8)  | Mn2B-N22A | 2.216(7) | W1B-C15-N15 | 175.3(7)  | Mn2B-N22-C22 | 162.6(6) |
| W1B-C16                   | 2.166(9)  | Mn2B-N32A | 2.182(7) | W1B-C16-N16 | 179.4(9)  | Mn2B-N32-C32 | 167.1(7) |
| W1B-C17                   | 2.149(8)  | Mn2B-N500 | 2.236(6) | W1B-C17-N17 | 177.4(8)  | Mn3B-N13-C13 | 173.6(6) |
| W1B-C18                   | 2.164(8)  | Mn2B-N501 | 2.245(7) | W1B-C18-N18 | 178.6(7)  | Mn3B-N23-C23 | 164.3(7) |
| W2B-C21                   | 2.164(8)  | Mn2B-O5M  | 2.298(6) | W2B-C21-N21 | 177.6(7)  | Mn3B-N33-C33 | 169.7(7) |
| W2B-C22                   | 2.162(8)  | Mn3B-N13A | 2.202(7) | W2B-C22-N22 | 177.7(7)  | Mn4B-N14-C14 | 161.0(7) |
| W2B-C23                   | 2.188(9)  | Mn3B-N23A | 2.248(8) | W2B-C23-N23 | 177.6(7)  | Mn4B-N24-C24 | 162.7(7) |
| W2B-C24                   | 2.140(8)  | Mn3B-N33A | 2.250(7) | W2B-C24-N24 | 176.3(7)  | Mn4B-N34-C34 | 166.8(7) |
| W2B-C25                   | 2.162(9)  | Mn3B-N600 | 2.275(7) | W2B-C25-N25 | 177.2(7)  | Mn5B-N15-C15 | 166.4(6) |
| W2B-C26                   | 2.167(8)  | Mn3B-N601 | 2.248(7) | W2B-C26-N26 | 179.1(8)  | Mn5B-N25-C25 | 172.5(7) |
| W2B-C27                   | 2.162(9)  | Mn3B-O6M  | 2.192(7) | W2B-C27-N27 | 178.3(9)  | Mn5B-N35-C35 | 173.6(7) |
| W2B-C28                   | 2.168(9)  | Mn4B-N14  | 2.154(7) | W2B-C28-N28 | 178.8(8)  |              |          |
| W3B-C31                   | 2.169(8)  | Mn4B-N24  | 2.167(7) | W3B-C31-N31 | 177.3(7)  |              |          |
| W3B-C32                   | 2.148(7)  | Mn4B-N34  | 2.281(7) | W3B-C32-N32 | 179.7(8)  |              |          |
| W3B-C33                   | 2.178(9)  | Mn4B-N700 | 2.212(7) | W3B-C33-N33 | 171.2(7)  |              |          |
| W3B-C34                   | 2.173(9)  | Mn4B-N701 | 2.219(7) | W3B-C34-N34 | 176.0(8)  |              |          |
| W3B-C35                   | 2.153(9)  | Mn4B-O7M  | 2.184(6) | W3B-C35-N35 | 176.5(7)  |              |          |
| W3B-C36                   | 2.182(9)  | Mn5B-N15  | 2.256(7) | W3B-C36-N36 | 177.8(8)  |              |          |
| W3B-C37                   | 2.136(10) | Mn5B-N25  | 2.171(7) | W3B-C37-N37 | 179.5(11) |              |          |
| W3B-C38                   | 2.181(9)  | Mn5B-N35  | 2.164(7) | W3B-C38-N38 | 177.8(8)  |              |          |
|                           |           | Mn5B-N800 | 2.257(7) |             |           |              |          |
|                           |           | Mn5B-N801 | 2.241(6) |             |           |              |          |
|                           |           | Mn5B-O8M  | 2.241(6) |             |           |              |          |

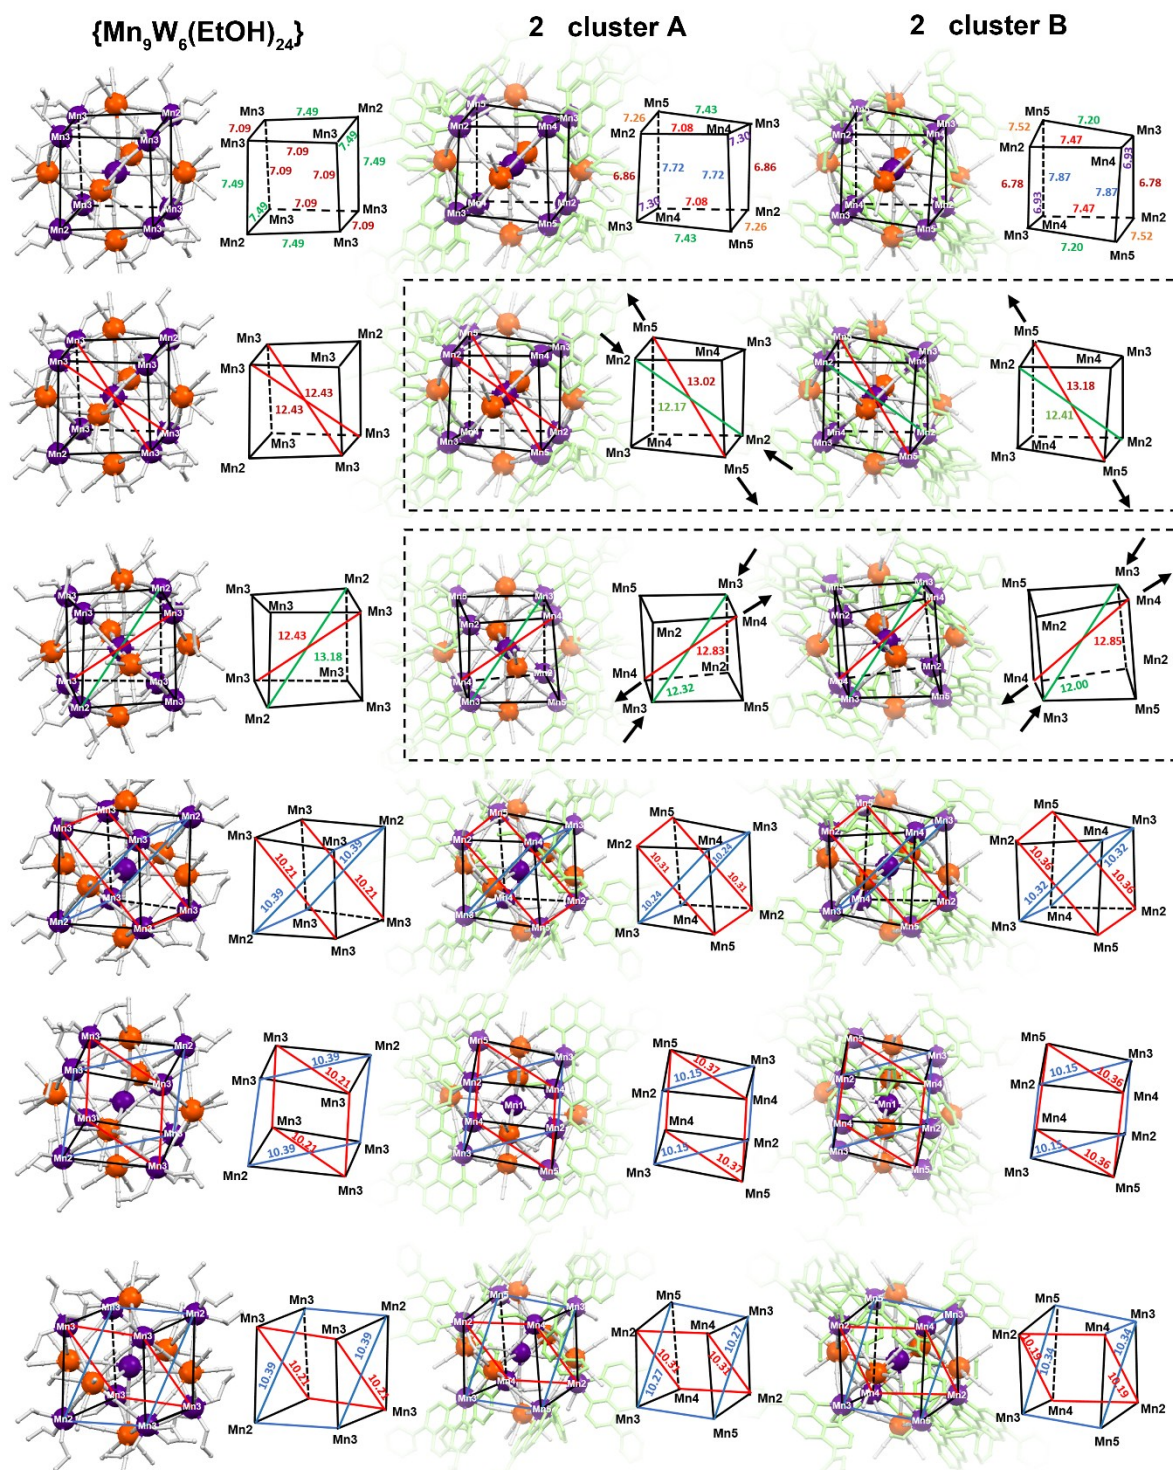

**Figure S4.** Comparison of  $\text{Mn}_8$  super-cube deformation in cluster skeleton. Data for compound  $\{\text{Mn}_9\text{W}_6(\text{EtOH})_{24}\}$  with high symmetry and relatively weak deformation were taken from Zh. J. Zhong et. al work<sup>S1</sup>. The frames indicate elongation of super-polyhedron.

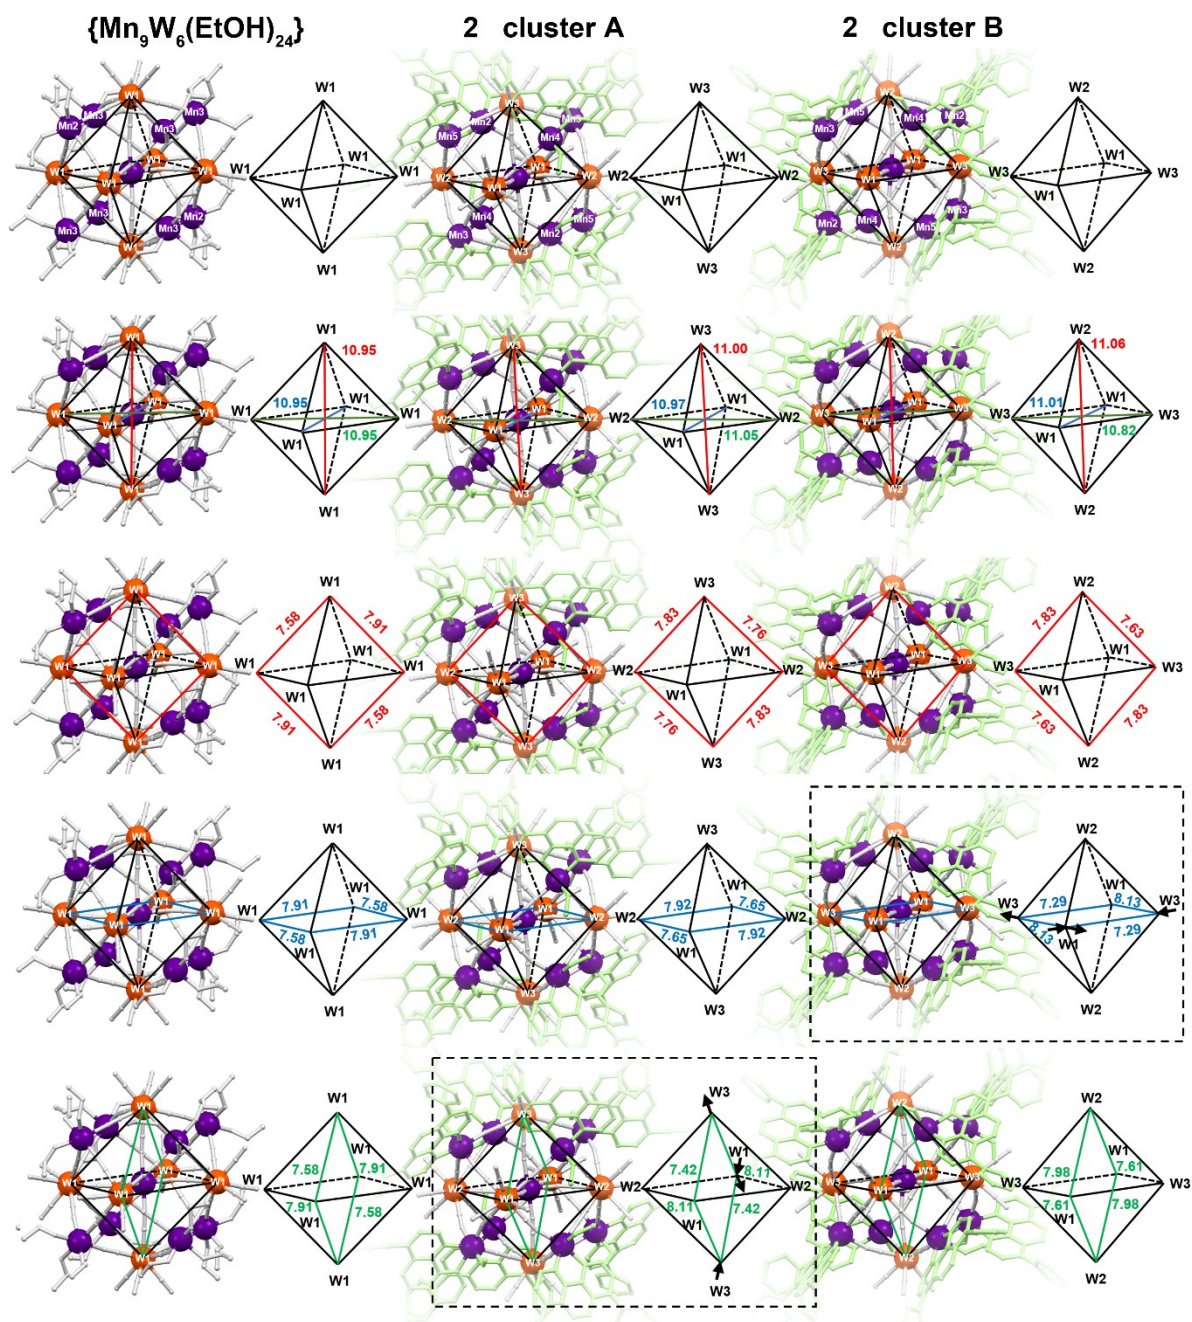

**Figure S5.** Comparison of  $\text{W}_6$  super-octahedron deformation in cluster skeleton. Data for compound  $\{\text{Mn}_9\text{W}_6(\text{EtOH})_{24}\}$  with high symmetry and relatively weak deformation were taken from Zh. J. Zhong et. al work<sup>S1</sup>. The frames indicate elongation of super-polyhedron.

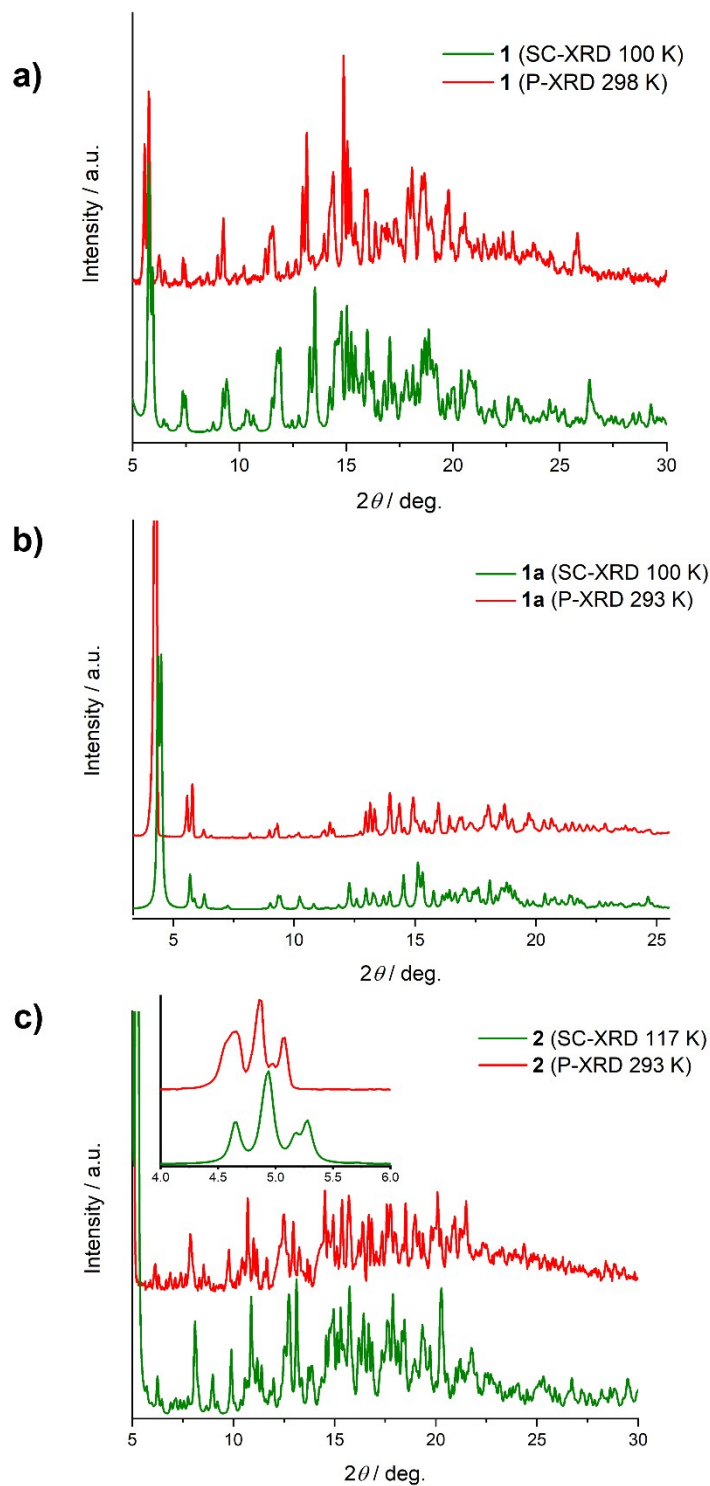

**Figure S6.** The comparison of experimental (red line) and calculated from SC-XRD model (green line) for **1** (a), **1a** (b) and **2** (c). Experimental patterns were collected using rotating capillary system in mother solution in room temperature. Shift of P-XRD peaks in relation to the calculated from XRD is related to standard temperature effect.

## CSM Calculations

**Table S6.** Results of Continuous Shape Measure Analysis (CSM) for Mn<sup>2+</sup> sites in **1,1a,2**.

| <b>1</b>  | <b>CSM Parameters</b> |             |              |
|-----------|-----------------------|-------------|--------------|
|           | <b>PPY-6</b>          | <b>OC-6</b> | <b>TPR-6</b> |
| Mn1       | 29.561                | 0.222       | 15.578       |
| Mn2*      | 25.917                | 0.956       | 13.442       |
| Mn2*      | 26.332                | 0.877       | 14.011       |
| Mn3       | 24.330                | 0.968       | 12.064       |
| Mn4       | 24.439                | 1.014       | 12.113       |
| Mn5       | 24.530                | 1.069       | 11.775       |
| <b>1a</b> | <b>CSM Parameters</b> |             |              |
|           | <b>PPY-6</b>          | <b>OC-6</b> | <b>TPR-6</b> |
| Mn1       | 28.879                | 0.278       | 15.553       |
| Mn2       | 24.123                | 0.865       | 13.851       |
| Mn3       | 25.139                | 0.835       | 13.130       |
| Mn4       | 24.057                | 1.235       | 11.100       |
| Mn5       | 23.038                | 1.325       | 11.028       |
| <b>2</b>  | <b>CSM Parameters</b> |             |              |
|           | <b>PPY-6</b>          | <b>OC-6</b> | <b>TPR-6</b> |
| Mn1A      | 29.491                | 0.066       | 16.318       |
| Mn2A      | 25.406                | 0.995       | 12.497       |
| Mn3A      | 24.006                | 1.089       | 11.315       |
| Mn4A      | 22.530                | 1.065       | 12.431       |
| Mn5A      | 26.731                | 0.578       | 14.374       |
| Mn1B      | 29.081                | 0.132       | 16.144       |
| Mn2B      | 25.842                | 0.967       | 13.065       |
| Mn3B      | 25.376                | 0.985       | 13.262       |
| Mn4B      | 26.793                | 0.550       | 15.749       |
| Mn5B      | 25.659                | 0.820       | 13.395       |

\* - Mn2 site is coordinated by two sets of crystallographically independent MeOH, btubupy, ligands.

Polyhedra codes:-

PPY-6 – parameter of pentagonal pyramid geometry related to the C<sub>5</sub>V symmetry.

OC-6 – parameter of octahedron geometry related to the Oh symmetry.

TPR-6 – parameter of trigonal prism geometry related to the D<sub>3h</sub> symmetry.

CSM parameter for ideal geometry equal 0 and increase with distortion from ideal polyhedron.

**Table S7.** Results of Continuous Shape Measure Analysis (CSM) for  $[\text{W}(\text{CN})_8]^{3-}$  anions in **1,1a,2**.

| <b>1</b>  | <b>CSM Parameters</b> |              |               |
|-----------|-----------------------|--------------|---------------|
|           | <b>SAPR-8</b>         | <b>TDD-8</b> | <b>BTPR-8</b> |
| W1        | 1.100                 | 1.619        | 0.842         |
| W2        | 1.071                 | 1.602        | 0.899         |
| W3        | 0.917                 | 1.659        | 0.933         |
| <b>1a</b> | <b>CSM Parameters</b> |              |               |
|           | <b>SAPR-8</b>         | <b>TDD-8</b> | <b>BTPR-8</b> |
| W1        | 1.003                 | 1.531        | 0.783         |
| W2        | 1.086                 | 1.627        | 0.804         |
| W3        | 0.850                 | 1.056        | 1.273         |
| <b>2</b>  | <b>CSM Parameters</b> |              |               |
|           | <b>SAPR-8</b>         | <b>TDD-8</b> | <b>BTPR-8</b> |
| W1A       | 1.984                 | 0.524        | 1.394         |
| W2A       | 1.179                 | 0.999        | 1.160         |
| W3A       | 1.937                 | 0.325        | 1.612         |
| W1B       | 0.401                 | 1.803        | 1.293         |
| W2B       | 1.117                 | 0.795        | 1.570         |
| W3B       | 3.032                 | 0.315        | 2.031         |

Polyhedra codes:-

SAPR-8 – parameter of square antiprism geometry related to the  $D_{4d}$  symmetry.

TDD-8 – parameter of triangular dodecaedron geometry related to the  $D_{2d}$  symmetry.

BTPR-8 – parameter of bicapped trigonal prism geometry related to the  $C_{2v}$  symmetry.

CSM parameter for ideal geometry equal 0 and increase with distortion from ideal polyhedron.

**Table S8.** List of intermetallic separation between cluster units for compound **2**.

|           |         |
|-----------|---------|
| Type I    | 12.406Å |
| Type II   | 12.505Å |
| Type II   | 13.540Å |
| Type IV   | 12.000Å |
| Type V    | 11.313Å |
| Type VI   | 12.966Å |
| Type VII  | 13.513Å |
| Type VIII | 9.477Å  |

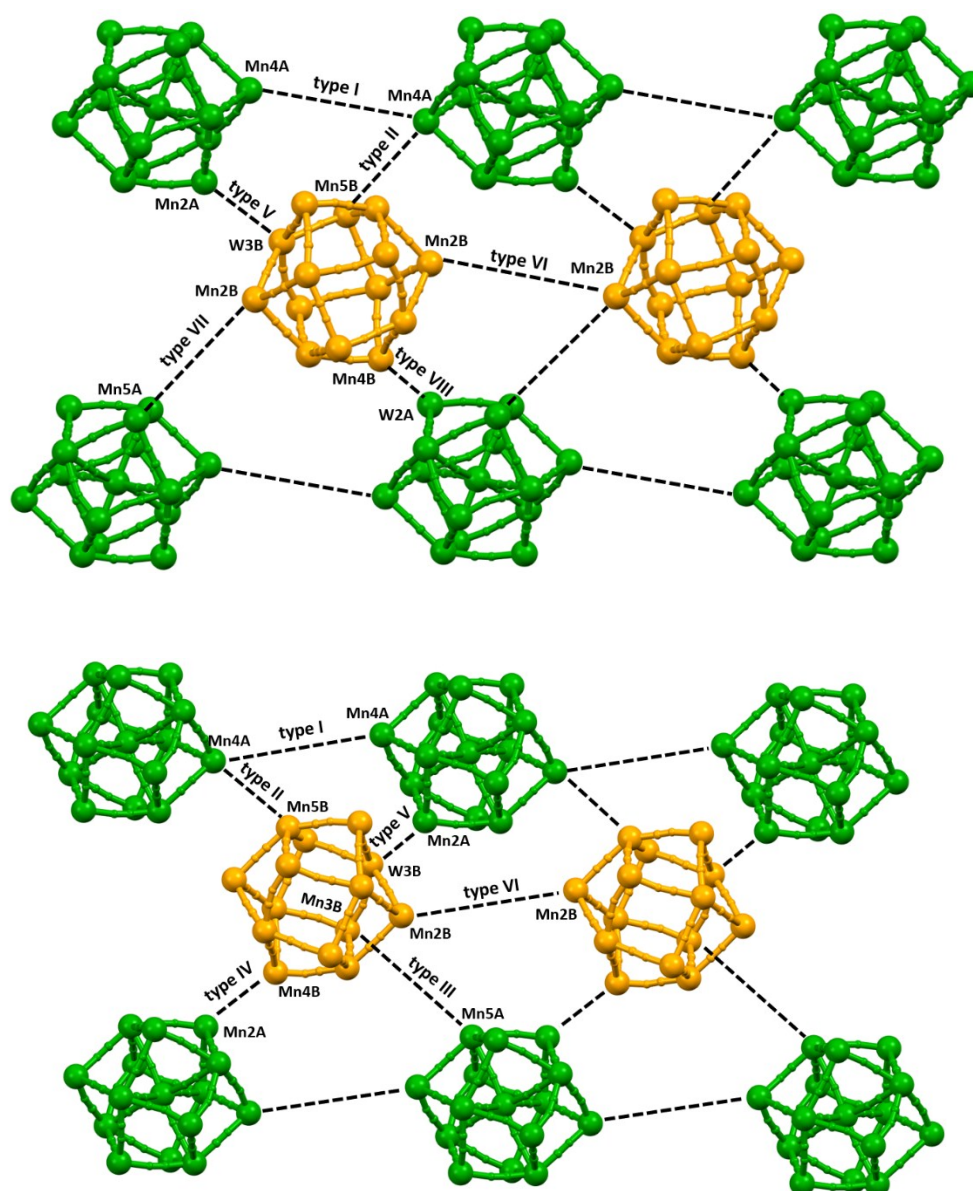

**Figure S7.** Map of intermetallic separation between cluster units for compound **2**.

## II. Magnetic properties

### Static magnetic properties

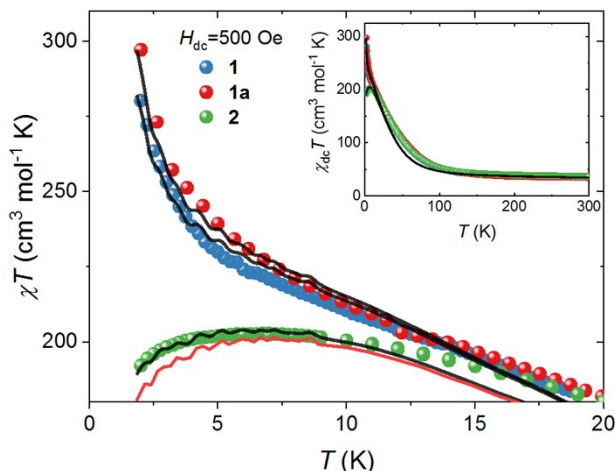

**Figure S8.** Temperature dependence of  $\chi T$  for **1**, **1a** and **2** as measured at  $H_{dc}=500$  Oe. The temperature dependences of  $\chi T$  are very similar for all compounds from room temperature down to about 20 K. At 300 K the  $\chi T$  values were determined as 36.8, 35.1 and 37.0  $\text{cm}^3 \text{mol}^{-1} \text{K}$  respectively for **1**, **1a** and **2**. Those values are smaller than 41.7  $\text{cm}^3 \text{mol}^{-1} \text{K}$  expected for uncoupled nine  $\text{Mn}^{\text{II}}$  ions ( $S_{\text{Mn}}=5/2$ ,  $g_{\text{Mn}}=2.0$ ) and six  $\text{W}^{\text{V}}$  ions ( $S_{\text{W}}=1/2$ ,  $g_{\text{W}}=2.0$ ) which points to non-negligible antiferromagnetic intramolecular interactions at room temperature. Similar behaviour was observed in our previous study of  $\{\text{Mn}_9[\text{W}(\text{CN})_8]_6(4,4'\text{-dpds})_4\}$  and other cyanide-bridge MnW compound.<sup>S12-S15</sup> Below 20 K the  $\chi T$  values for each compound diverge as a consequence of intermolecular interactions. The black lines show the fits to eq. 1 (from the main text), while the red line shows the values for isolated cluster  $\chi_{\text{iso}} T$  with two exchange constants  $J_{\text{ap}}=-8.0 \text{ cm}^{-1}$  and  $J_{\text{eq}}=-19.2 \text{ cm}^{-1}$  (related to apical and equatorial CN bridges, respectively).

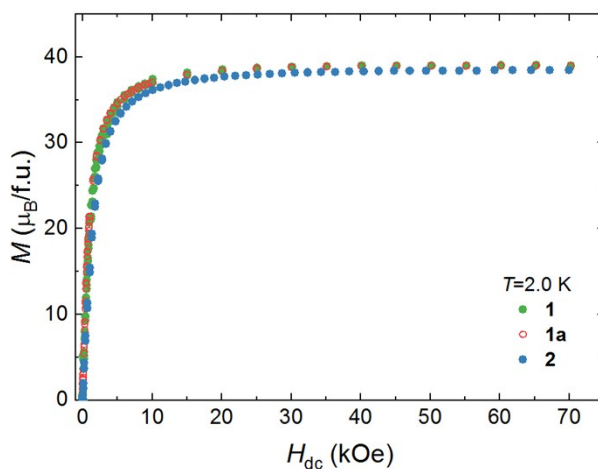

**Figure S9.** Isothermal magnetization measured at 2.0 K for **1**, **1a** and **2**.



## Magnetic relaxation properties

The ac susceptibility as a function of frequency was analyzed with generalized Debye model with one (1) and two independent relaxation times (1a and 2). The formula for one relaxation process is given by formula:

$$\chi(\omega) = \chi_s + \frac{(\chi_T - \chi_s)}{1 + (i\omega\tau)^{1-\alpha}} \quad (\text{eq. S1}),$$

while the equation for two relaxation times take form:

$$\chi(\omega) = \chi_s + (\chi_T - \chi_s) \left[ \frac{\beta}{1 + (i\omega\tau_1)^{1-\alpha_1}} + \frac{1-\beta}{1 + (i\omega\tau_2)^{1-\alpha_2}} \right], \quad (\text{eq. S2}).$$

In both equations (eq. S1 and eq. S2)  $\chi_s$  is the adiabatic susceptibility,  $\chi_T$  is the isothermal susceptibility,  $\omega=2\pi f$  is the angular frequency,  $\tau$ ,  $\tau_1$  and  $\tau_2$  are the relaxation times,  $\alpha$ ,  $\alpha_1$  and  $\alpha_2$  (values from 0 to 1) are the distributions of the relaxation processes,  $\beta$  (values from 0 to 1) is the relative weight of the susceptibility change related to first relaxation process ( $\tau_1$ ) whereas the  $1-\beta$  is related with the second relaxation process ( $\tau_2$ ).

The real part and the imaginary part for single relaxation time are given by (eq. S3) and (eq. S4), respectively.

$$\chi' = \chi_s + \frac{(\chi_T - \chi_s)[1 + (\omega\tau)^{1-\alpha} \sin(1/2\alpha\pi)]}{1 + 2(\omega\tau)^{1-\alpha} \sin(1/2\alpha\pi) + (\omega\tau_1)^{2(1-\alpha)}} \quad (\text{eq. S3})$$

$$\chi'' = \frac{(\chi_T - \chi_s)(\omega\tau)^{1-\alpha} \cos(1/2\alpha\pi)}{1 + 2(\omega\tau)^{1-\alpha} \sin(1/2\alpha\pi) + (\omega\tau)^{2(1-\alpha)}} \quad (\text{eq. S4})$$

In case of two relaxation processes the real part and the imaginary part are given by Eq. (S5) and Eq. (S6), respectively.

$$\chi' = \chi_s + (\chi_T - \chi_s) \times \left\{ \frac{\beta[1 + (\omega\tau_1)^{1-\alpha_1} \sin(1/2\alpha_1\pi)]}{1 + 2(\omega\tau_1)^{1-\alpha_1} \sin(1/2\alpha_1\pi) + (\omega\tau_1)^{2(1-\alpha_1)}} + \frac{(1-\beta)[1 + (\omega\tau_2)^{1-\alpha_2} \sin(1/2\alpha_2\pi)]}{1 + 2(\omega\tau_2)^{1-\alpha_2} \sin(1/2\alpha_2\pi) + (\omega\tau_2)^{2(1-\alpha_2)}} \right\} \quad (\text{eq. S5})$$

$$\chi'' = (\chi_T - \chi_s) \left\{ \frac{\beta(\omega\tau_1)^{1-\alpha_1} \cos(1/2\alpha_1\pi)}{1 + 2(\omega\tau_1)^{1-\alpha_1} \sin(1/2\alpha_1\pi) + (\omega\tau_1)^{2(1-\alpha_1)}} + \frac{(1-\beta)(\omega\tau_2)^{1-\alpha_2} \cos(1/2\alpha_2\pi)}{1 + 2(\omega\tau_2)^{1-\alpha_2} \sin(1/2\alpha_2\pi) + (\omega\tau_2)^{2(1-\alpha_2)}} \right\} \quad (\text{eq. S6})$$

6)

The in-phase ( $\chi'$ ) and out-of-phase ( $\chi''$ ) components of ac susceptibility were fitted simultaneously.

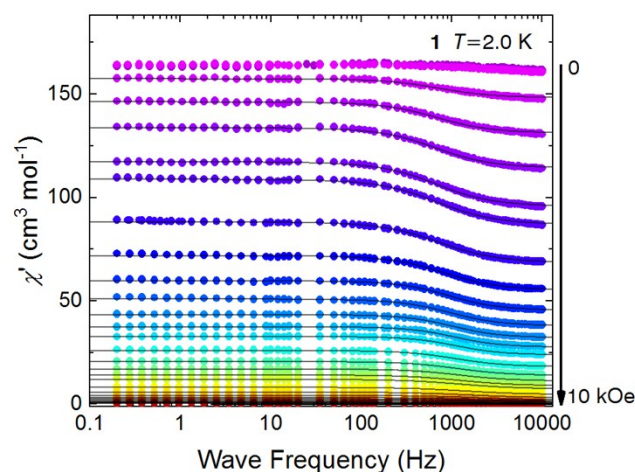

**Figure S10.** Frequency dependence of in-phase ac susceptibility ( $\chi'$ ) in dc field range: 0 - 10 kOe at 2.0 K for **1**. The solid lines correspond to the extended Debye model fits.

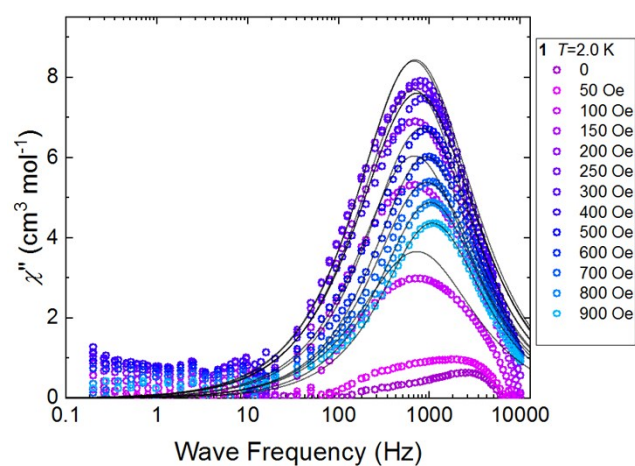

**Figure S11.** Frequency dependence of out-of-phase ac susceptibility ( $\chi''$ ) in dc field range: 0 - 900 Oe at 2.0 K for **1**. The solid lines correspond to the extended Debye model fits.

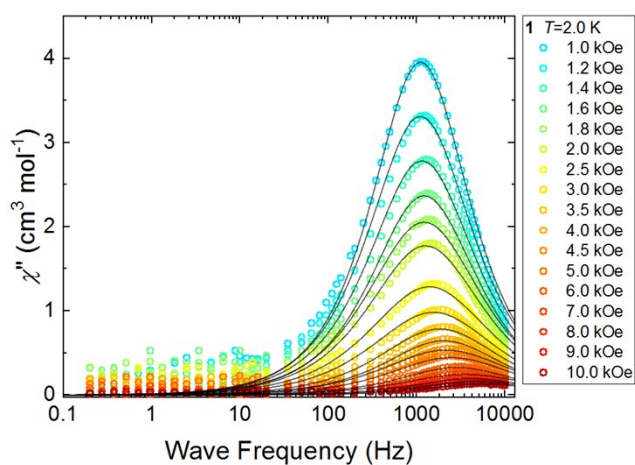

**Figure S12.** Frequency dependence of out-of-phase component of ac susceptibility ( $\chi''$ ) in dc field range: 1 – 10 kOe at 2.0 K for **1**. The solid lines correspond to the extended Debye model fits.

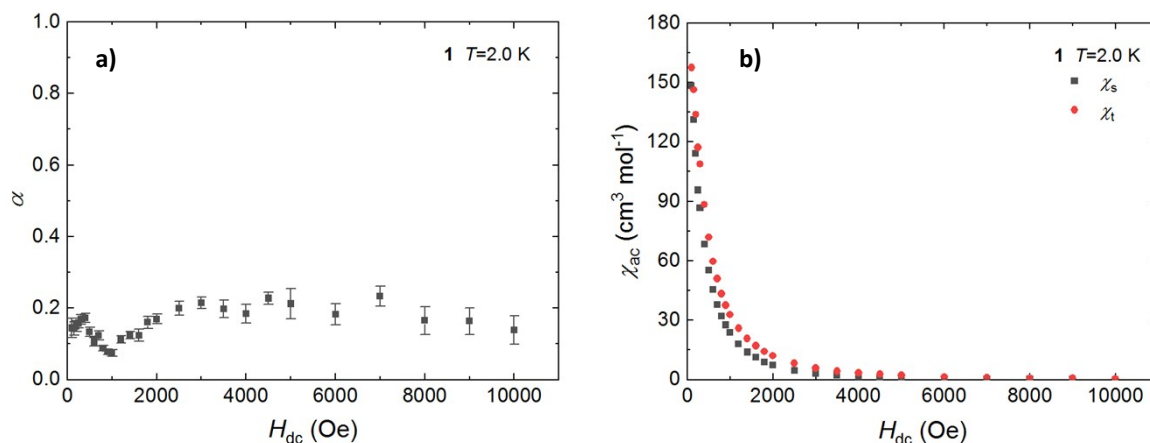

**Figure S13.** a) dc field dependence of  $\alpha$  parameter at 2.0 K for **1**. b) dc field dependence of the adiabatic susceptibility  $\chi_s$  (black squares) and isothermal susceptibility  $\chi_t$  (red circles) at 2.0 K for **1**.

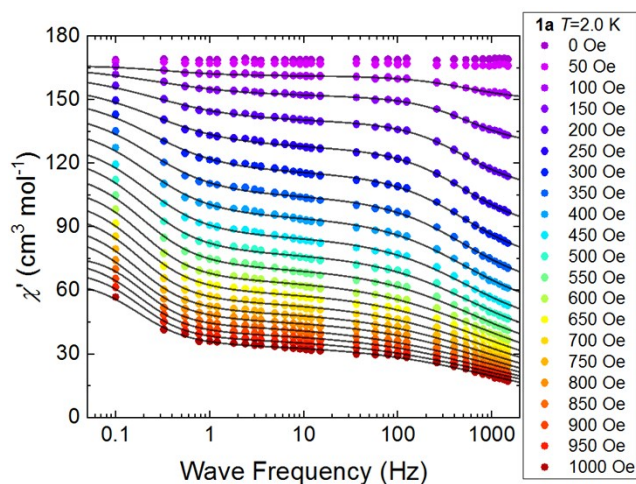

**Figure S14.** Frequency dependence of in-phase ac susceptibility ( $\chi'$ ) in dc field range: 0 - 1 kOe at 2.0 K for **1a**. The solid lines correspond to the extended Debye model fits.

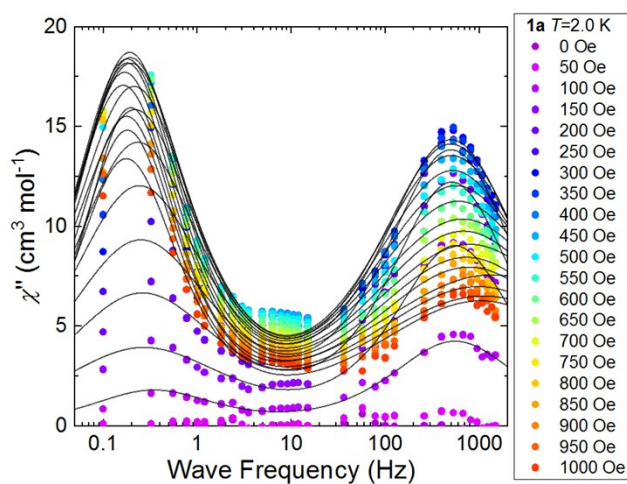

**Figure S15.** Frequency dependence of out-of-phase ac susceptibility ( $\chi''$ ) in dc field range: 0 - 1 kOe at 2.0 K for **1a**. The solid lines correspond to the extended Debye model fits.

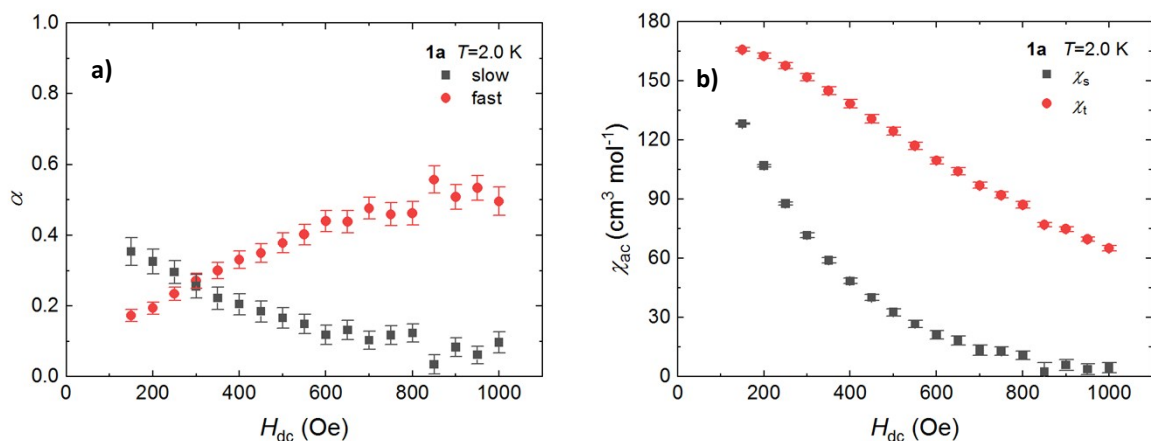

**Figure S16.** a) dc field dependence of  $\alpha$  parameter at 2.0 K for **1a**. b) dc field dependence of the adiabatic susceptibility  $\chi_s$  (black squares) and isothermal susceptibility  $\chi_t$  (red circles) at 2.0 K for **1a**.

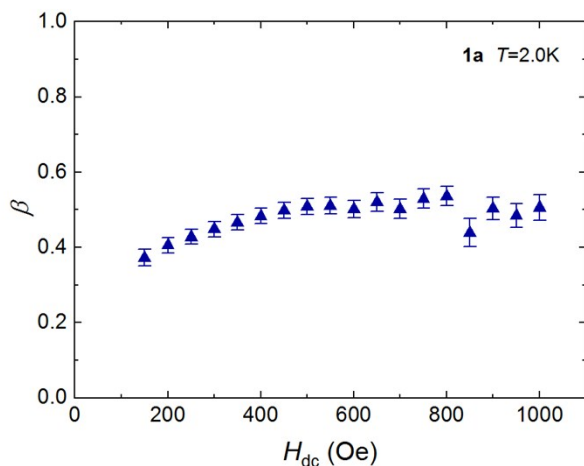

**Figure S17.** dc field dependence of the weight of the slow relaxation process  $\beta$  at 2.0 K for **1a**.

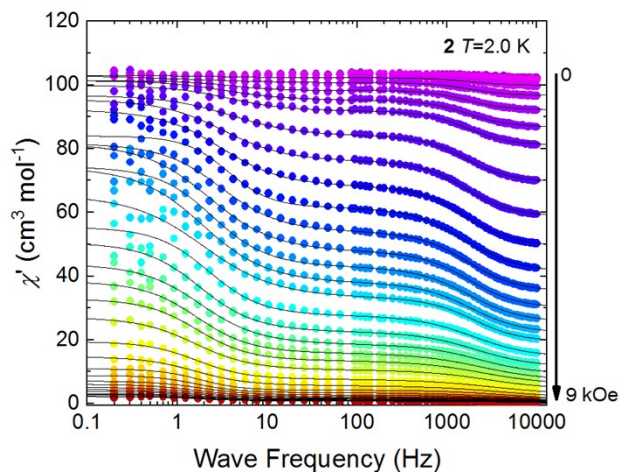

**Figure S18.** Frequency dependence of in-phase ac susceptibility ( $\chi'$ ) in dc field range: 0 – 9 kOe at 2.0 K for **2**. The solid lines correspond to the extended Debye model fits.

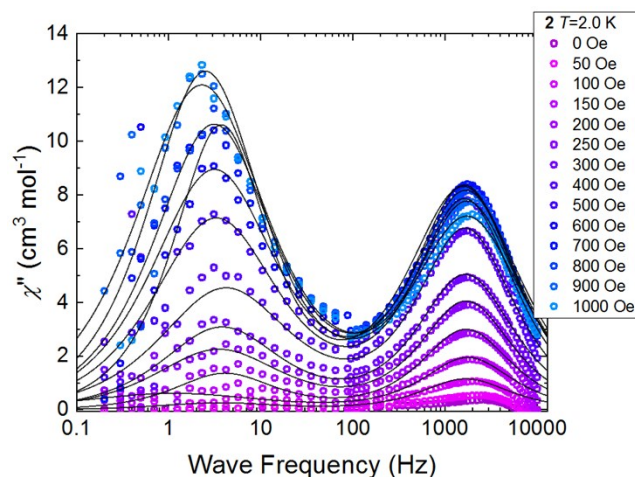

**Figure S19.** Frequency dependence of out-of-phase ac susceptibility ( $\chi''$ ) in dc field range: 0 - 1000 Oe at 2.0 K for **2**. The solid lines correspond to the extended Debye model fits.

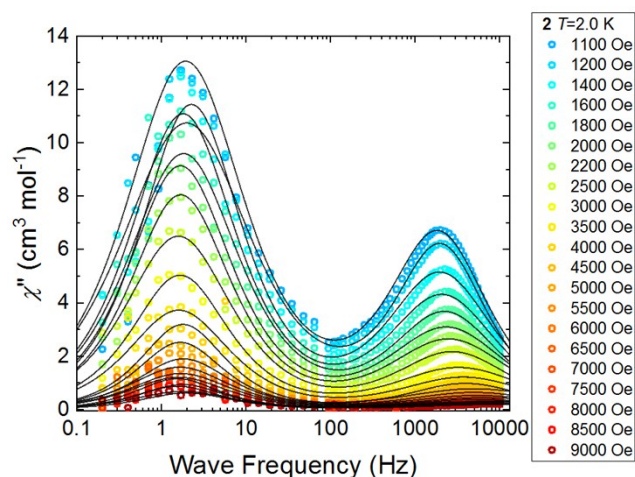

**Figure S20.** Frequency dependence of out-of-phase ac susceptibility ( $\chi''$ ) in dc field range: 1100 - 9000 Oe at 2.0 K for **2**. The solid lines correspond to the extended Debye model fits.

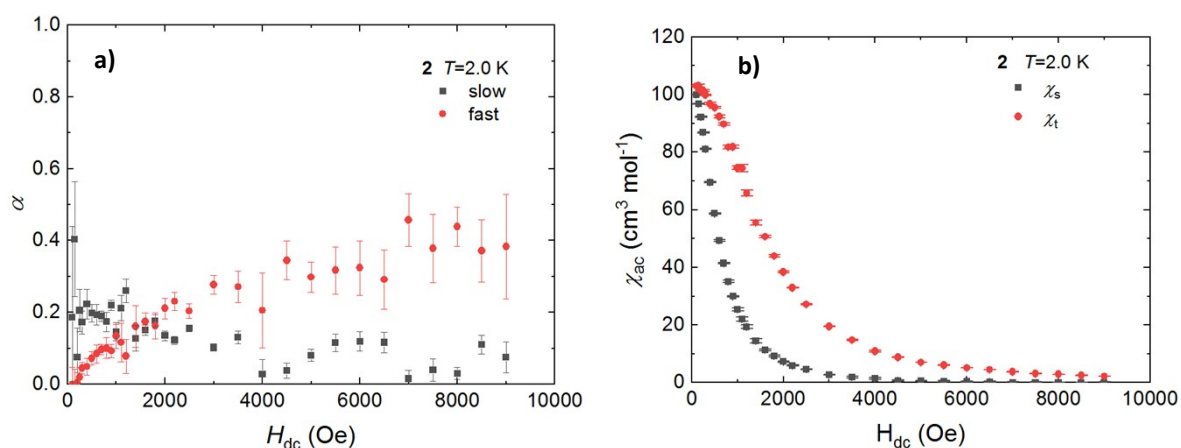

**Figure S21. a)** dc field dependence of  $\alpha$  parameter at 2.0 K for **2**. **b)** Black squares correspond to slow relaxation process ( $\tau_{2\text{-slow}}$ ), while red circles to the fast relaxation time ( $\tau_{2\text{-fast}}$ ).

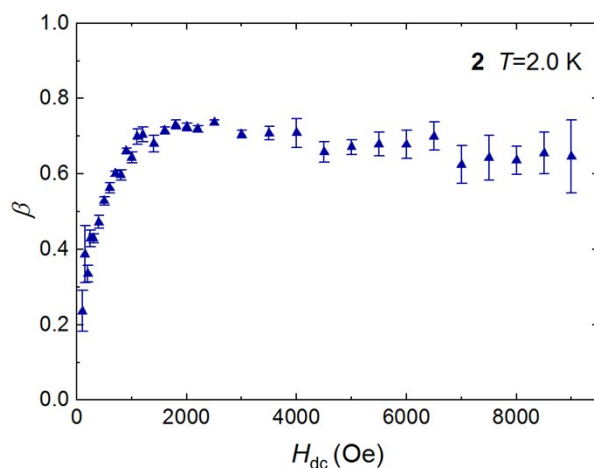

**Figure S22.** dc field dependence of the weight of the slow relaxation process  $\beta$  at 2.0 K for **2**.

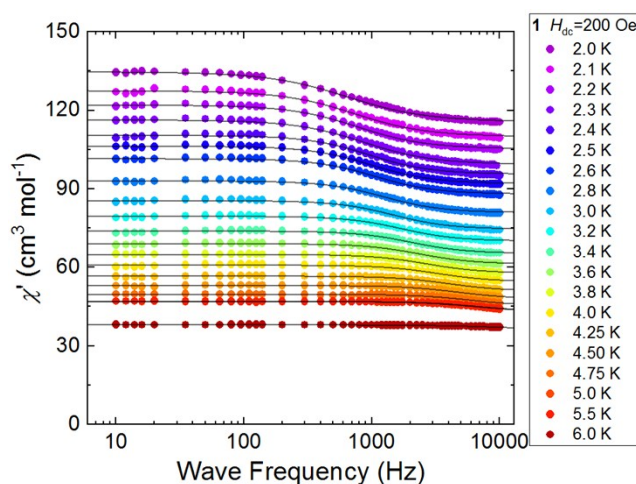

**Figure S23.** Frequency dependence of in-phase ac susceptibility ( $\chi'$ ) with applied field of 200 Oe in temperature range: 2.0 K - 6.0 K for **1**. The solid lines correspond to the extended Debye model fits.

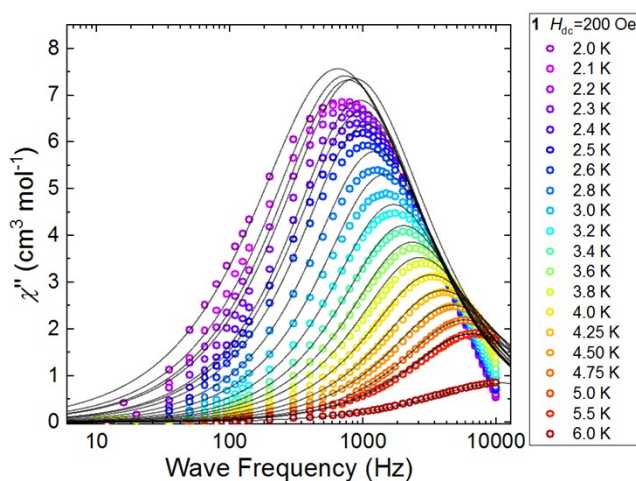

**Figure S24.** Frequency dependence of out-of-phase ac susceptibility ( $\chi''$ ) with applied field of 200 Oe in temperature range: 2.0 K - 6.0 K for **1**. The solid lines correspond to the extended Debye model fits.

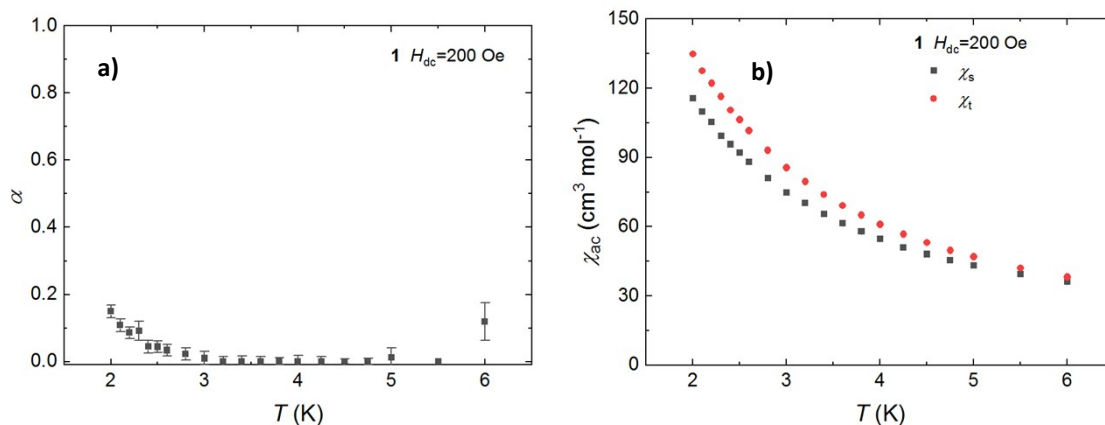

**Figure S25.** a) Temperature dependence of  $\alpha$  parameter with applied field of 200 Oe for **1**. b) Temperature dependence of the adiabatic susceptibility  $\chi_s$  (black circles) and isothermal susceptibility  $\chi_t$  (red circles) at 200 Oe for **1**.

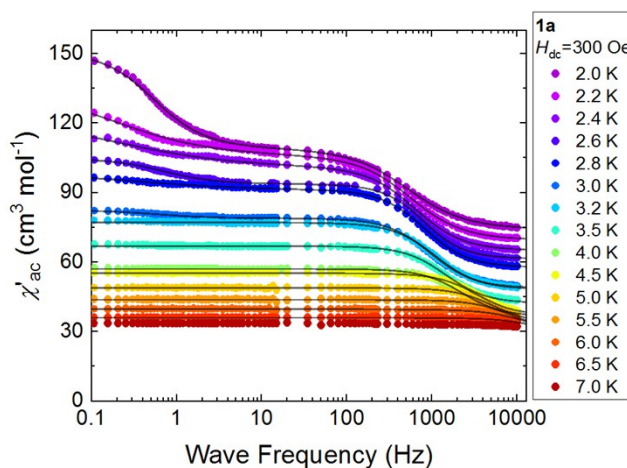

**Figure S26.** Frequency dependence of in-phase ac susceptibility ( $\chi'$ ) with applied field of 300 Oe in temperature range: 2.0 K - 7.0 K for **1a**. The solid lines correspond to the extended Debye model fits.

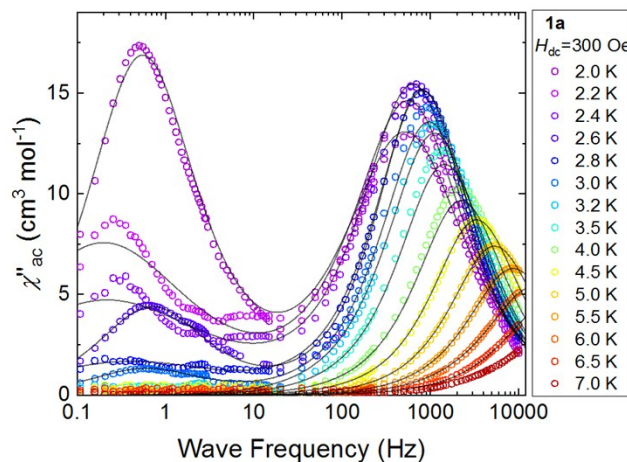

**Figure S27.** Frequency dependence of out-of-phase ac susceptibility ( $\chi''$ ) with applied field of 300 Oe in temperature range: 2.0 K - 7.0 K for **1a**. The solid lines correspond to the extended Debye model fits.

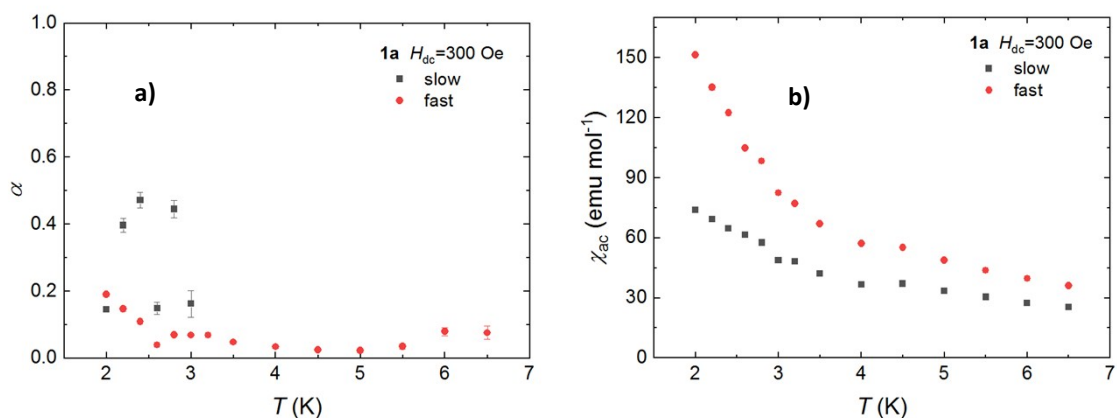

**Figure S28.** **a)** Temperature dependence of  $\alpha$  parameter with applied field 300 Oe for **1a**. Black squares correspond to slow relaxation process ( $\tau_{2\text{-slow}}$ ), while red circles to the fast relaxation time ( $\tau_{2\text{-fast}}$ ). **b)** Temperature dependence of the adiabatic susceptibility  $\chi_s$  (black squares) and isothermal susceptibility  $\chi_t$  (red circles) at 300 Oe for **1a**.

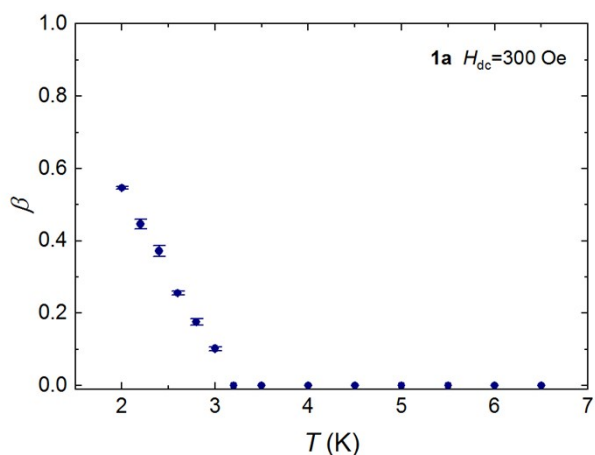

**Figure S29.** Temperature dependence of the weight of the slow relaxation process  $\beta$  in applied field 300 Oe for **1a**.

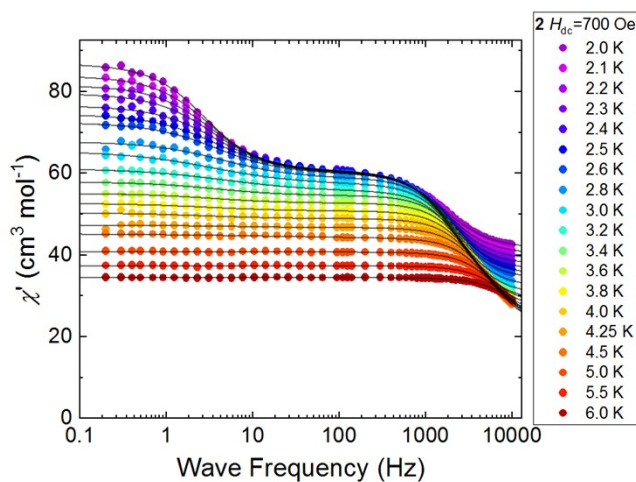

**Figure S30.** Frequency dependence of in-phase ac susceptibility ( $\chi'$ ) with applied field of 700 Oe in temperature range: 2.0 K - 6.0 K for **2**. The solid lines correspond to the extended Debye model fits.



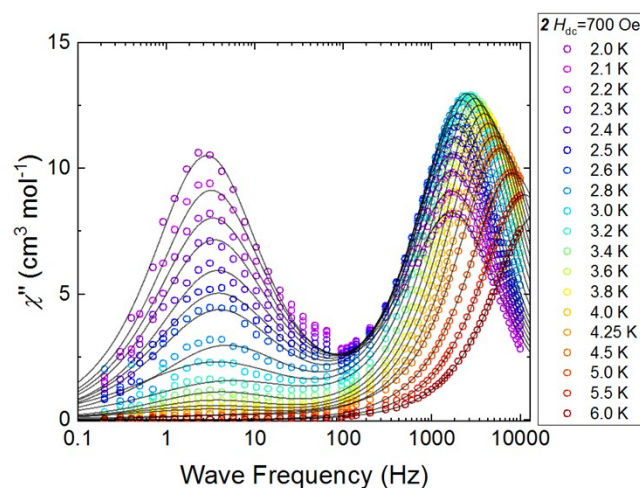

**Figure S31.** Frequency dependence of out-of-phase ac susceptibility ( $\chi''$ ) with applied field of 700 Oe in temperature range: 2.0 K - 6.0 K for **2**. The solid lines correspond to the extended Debye model fits.

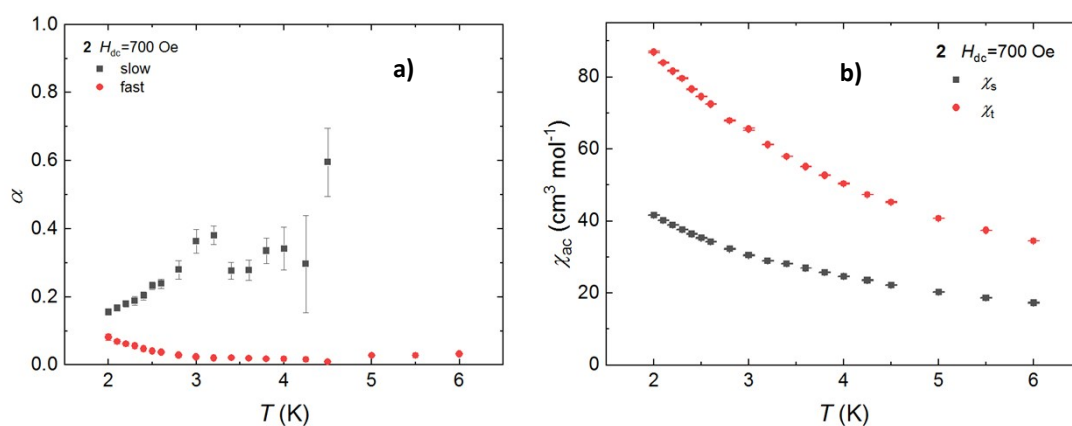

**Figure S32. a)** Temperature dependence of  $\alpha$  parameter for the slow relaxation time (black squares) and fast relaxation time (red circles) in applied field of 700 Oe for **2**. **b)** Temperature dependence of the adiabatic susceptibility  $\chi_s$  (black squares) and isothermal susceptibility  $\chi_t$  (red circles) at 700 Oe for **2**.

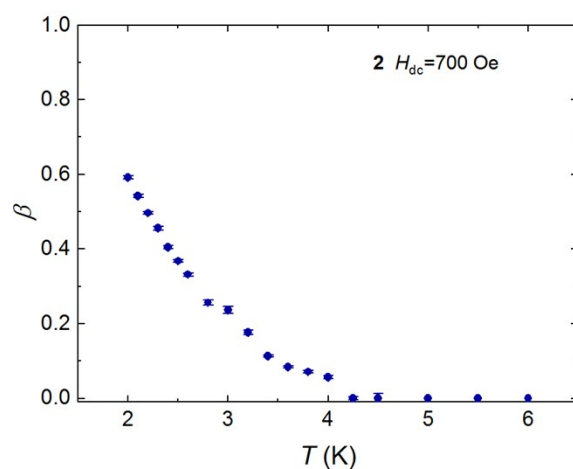

**Figure S33.** Temperature dependence of the weight of the slow relaxation process  $\beta$  in applied field of 700 Oe for **2**.

- S1. Zh. J. Zhong, S., Hidetake. Y. Mizobe, M. Hidai, A. Fujishima, S. Ohkoshi, K. Hashimoto, Kazuhito, *J. Am. Chem. Soc.* 2000, 122, 2952-2953.
- S2. D. Pinkowicz, R. Podgajny, B. Nowicka, S. Chorazy, M. Reczynski, B. Sieklucka, *Inorg. Chem. Front.* **2015**,2, 10-27.
- S3. P. Konieczny, S. Chorazy, R. Pełka, K. Bednarek, T. Wasiutyński, S. Baran, B. Sieklucka, R. Podgajny, *Inorg. Chem.* **2017**,56, 7089-7098.
- S4. B. Nowicka, T. Korzeniak, O. Stefańczyk, D. Pinkowicz, S. Chorąży, R. Podgajny, B. Sieklucka, *Coord. Chem. Rev.* **2012**,256, 1946-1971.
- S5. Y.-Q. Zhang, C.-L. Luo, *Dalton, Trans.* 2008, 4575-4584.
